# Supplementary material for: Ionothermal synthesis and proton-conductive properties of NH2-MIL-53 MOF nanomaterials
Source: Royal Society of Chemistry journal article supplement (doi:10.1039/c5ce02141c), 2016-01-01
Supplement: c5ce02141c1.pdf [file c5ce02141c1.pdf]

## Supporting Information

### **Ionothermal Synthesis and Proton-Conductive Property of NH<sub>2</sub>-MIL-53 MOF Nanomaterials**

Jia Liu,<sup>a</sup> Xiaoqin Zou,<sup>b\*</sup> Chuanfang Liu,<sup>b</sup> Kun Cai,<sup>c</sup> Nian Zhao,<sup>c</sup> Weitao Zheng<sup>a\*</sup> and  
Guangshan Zhu<sup>c</sup>

<sup>a</sup> Department of Materials Science, Key Laboratory of Mobile Materials, MOE, and  
State Key Laboratory of Superhard Materials, Jilin University, Changchun 130012,  
China. E-mail: [wzheng@jlu.edu.cn](mailto:wzheng@jlu.edu.cn).

<sup>b</sup> Faculty of Chemistry, Northeast Normal University, Changchun 130024, P. R.  
China. E-mail: [xiaoqinzou123@gmail.com](mailto:xiaoqinzou123@gmail.com).

<sup>c</sup> State Key Laboratory of Inorganic Synthesis and Preparative Chemistry, College of  
Chemistry, Jilin University, Changchun 130012, China.

### **Experimental Section**

#### *1. Chemicals*

AlCl<sub>3</sub>•6H<sub>2</sub>O (Aladdin Reagent, Co., Ltd, Shanghai, China, 99%), 2-aminoterephthalic acid (NH<sub>2</sub>-H<sub>2</sub>BDC, Energy Chemical, Shanghai, China, 98%), ionic liquid of 1-ethyl-3-methyl-imidazolium bromide (Shanghai Cheng Jie Chemical Co. Ltd, 99%), dimethylformamide (DMF), and ethanol were used as received.

#### *2. Synthesis of NH<sub>2</sub>-MIL-53(Al)<sub>it</sub>*

The typical preparation procedure involves firstly dissolving 190 mg NH<sub>2</sub>-H<sub>2</sub>BDC into 1 g melted 1-ethyl-3-methyl-imidazolium bromide at 100 °C under stirring until a clear solution was obtained; subsequently adding 127 mg AlCl<sub>3</sub>•6H<sub>2</sub>O into the solution above. The resulted clear precursor in a 10 mL closed glass vessel was heated at 150 °C for 7 days in a preheated oven, and then solid crystals were obtained. After cooling down, the product was cleaned with repeated centrifugations for 5 times using ethanol (10000 r/min, 10 minutes for each cycle) in order to remove the supernatant ionic liquid solvent. The collected powder was dried at 85 °C, and this sample is

designated as NH<sub>2</sub>-MIL-53(Al)<sub>it</sub>. The reference sample (designated as MIL-53(Al)<sub>it</sub>) was prepared according to the same protocol.<sup>33</sup> NH<sub>2</sub>-MIL-53(Al)<sub>ref(as)</sub> sample was synthesized from a liquid mixture of 493.6 mg AlCl<sub>3</sub>•6H<sub>2</sub>O and 379.6 mg NH<sub>2</sub>-H<sub>2</sub>BDC in 5 mL water at 150 °C for 5 h according to our previous procedure.<sup>36</sup> The obtained powder was first treated in DMF at 150 °C for 5 h, followed by repetitive washing (10 mL DMF, three times), and then activated under vacuum to remove the solvent at 150 °C overnight prior to further tests (designated as NH<sub>2</sub>-MIL-53(Al)<sub>ref</sub>).

### 3. Characterizations

The crystalline structures of NH<sub>2</sub>-MIL-53(Al)<sub>it</sub> crystals were determined by X-ray diffraction (XRD) measurements using Rigaku D/MAX2550 diffractometer with Cu-K $\alpha$  radiation ( $\lambda = 1.5418 \text{ \AA}$ ) running at a voltage of 50 kV and a current of 200 mA. The morphology of this sample was observed on field-emission scanning electron microscope (FE-SEM: Hitachi SU8010) and transmission electron microscope (TEM: JEOL JSM-3010). Fourier transform infrared spectra (FTIR) were collected on a Nicolet Impact 410 FTIR spectrometer at room temperature in the range of 400-4000 cm<sup>-1</sup>, with potassium bromide pellets. Al content in NH<sub>2</sub>-MIL-53(Al) was analyzed by inductively coupled plasma atomic emission spectrometer (ICPAES, Perkin Elmer Optima 3300DV), and C, H, N contents were determined using a Perkin Elmer 2400 Series II CHNS/O analyzer. Simultaneous thermal gravimetric and differential thermal analyses (TG-DTA) were performed on NH<sub>2</sub>-MIL-53(Al)<sub>it</sub> and NH<sub>2</sub>-MIL-53(Al)<sub>ref</sub> samples in air (10 °C min<sup>-1</sup>) (Netzsch Sta 449c thermal analyzer). Based on the weight loss, the volume of ionic liquid occupied in pores (0.145 cm<sup>3</sup>) was calculated using the equation  $V_{il}=m/\rho$  ( $V$  is the volume of ionic liquid,  $m$  is its mass,  $\rho$  is the density of 1.3 g cm<sup>-3</sup>). The pore volume in NH<sub>2</sub>-MIL-53(Al) (0.167 cm<sup>3</sup>) was estimated from crystallography (Fig. S1)<sup>35</sup> using the equation of  $V_{\text{pore}}=(m/M)*NA*(\pi r^2 a)$  with the following parameters per unit cell:  $m$  is NH<sub>2</sub>-MIL-53(Al) mass without ionic liquid,  $M$  is the molar mass of 892 g mol<sup>-1</sup> with molecular formula of C<sub>32</sub>N<sub>4</sub>Al<sub>4</sub>O<sub>20</sub>H<sub>24</sub>,  $NA$  is Avogadro's number,  $r$  is the pore radius (pore diameter of ~0.75 nm),  $a=0.692$  nm,  $b=1.767$  nm,  $c=1.212$  nm. The pore filling factor

(0.87) is estimated from the difference between  $V_{il}$  and  $V_{pore}$ .

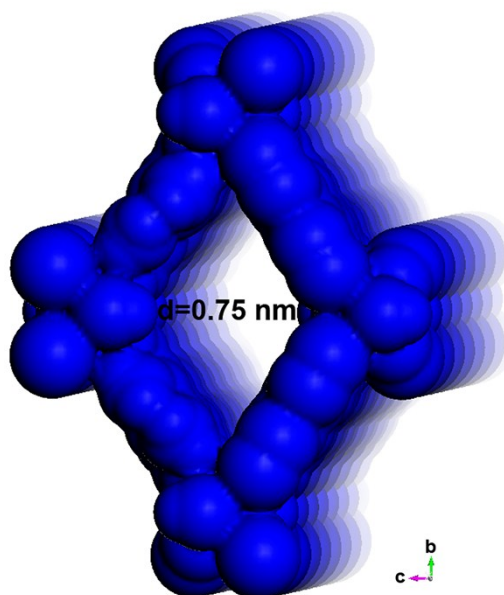

**Fig. S1** Crystallographic structure of  $\text{NH}_2\text{-MIL-53(Al)}$  unit cell.

#### 4. Proton conductivity

Pellets with 13 mm in diameter and 0.85-0.95 mm thick were prepared by pressing material (about 150 mg) at  $40 \text{ kN cm}^{-2}$ . The proton conductivities of  $\text{NH}_2\text{-MIL-53(Al)}_{it}$ ,  $\text{NH}_2\text{-MIL-53(Al)}_{ref}$  and  $\text{MIL-53(Al)}_{it}$  samples were estimated in a quasi-four-probe method conductivity cells by the AC impedance spectroscopy technique. The impedances were measured with a frequency response analyzer/potentiostat (Princeton Applied Research PAR 2273, EG&GPARC, Princeton, NJ) over a frequency range from 0.1 Hz to 1 MHz, 10 mV ac perturbation and 0.0 V dc rest voltage. The samples were covered with silver paint to improve contact with the two copper blocking electrodes in a measurement cell, and placed in a temperature and humidity controlled environment. The Nyquist plot obtained from impedance measurement comprises a depressed semicircular arc at high frequency and a spur at low frequency. The conductivity ( $\sigma$ ,  $\text{S cm}^{-1}$ ) of the sample was calculated from the impedance data, using the relation  $\sigma = L/RA$ , where  $L$  (cm) is the thickness of the sample,  $A$  ( $\text{cm}^2$ ) is the face area and  $R$  ( $\Omega$ ) is the sample resistance estimated by extrapolation of the high-frequency arc crossing to the real axis.<sup>9</sup> The measurements

have been repeated three times to get reproducible results.

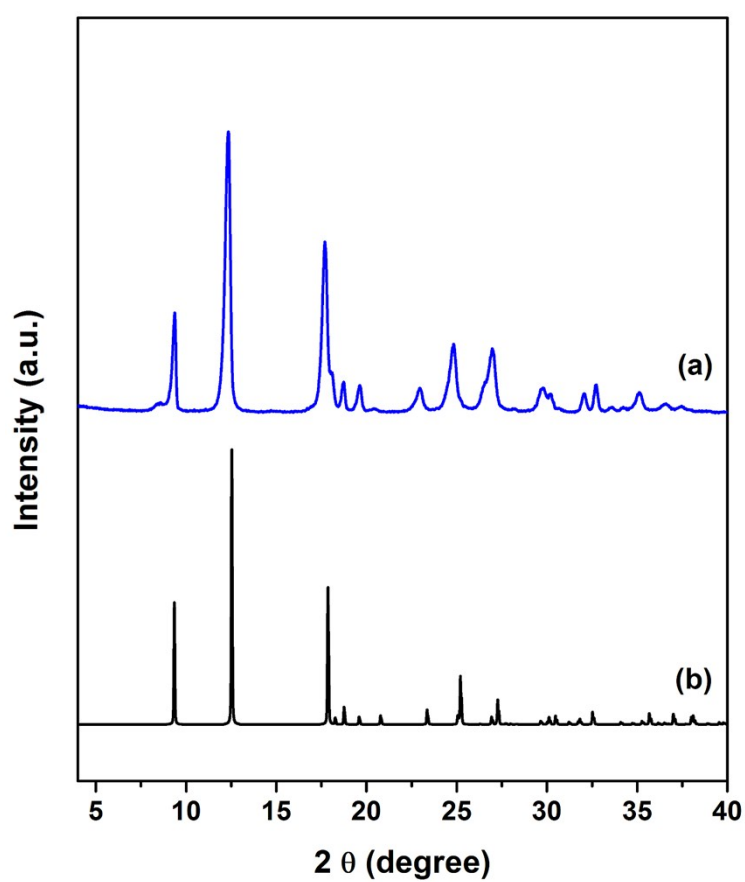

**Fig. S2** XRD patterns of (a)  $\text{NH}_2\text{-MIL-53(Al)}_{\text{ref}}$  and (b) simulated one from  $\text{Al(OH)[NH}_2\text{-BDC]}\cdot\text{H}_2\text{O}$  single crystal.<sup>35</sup>

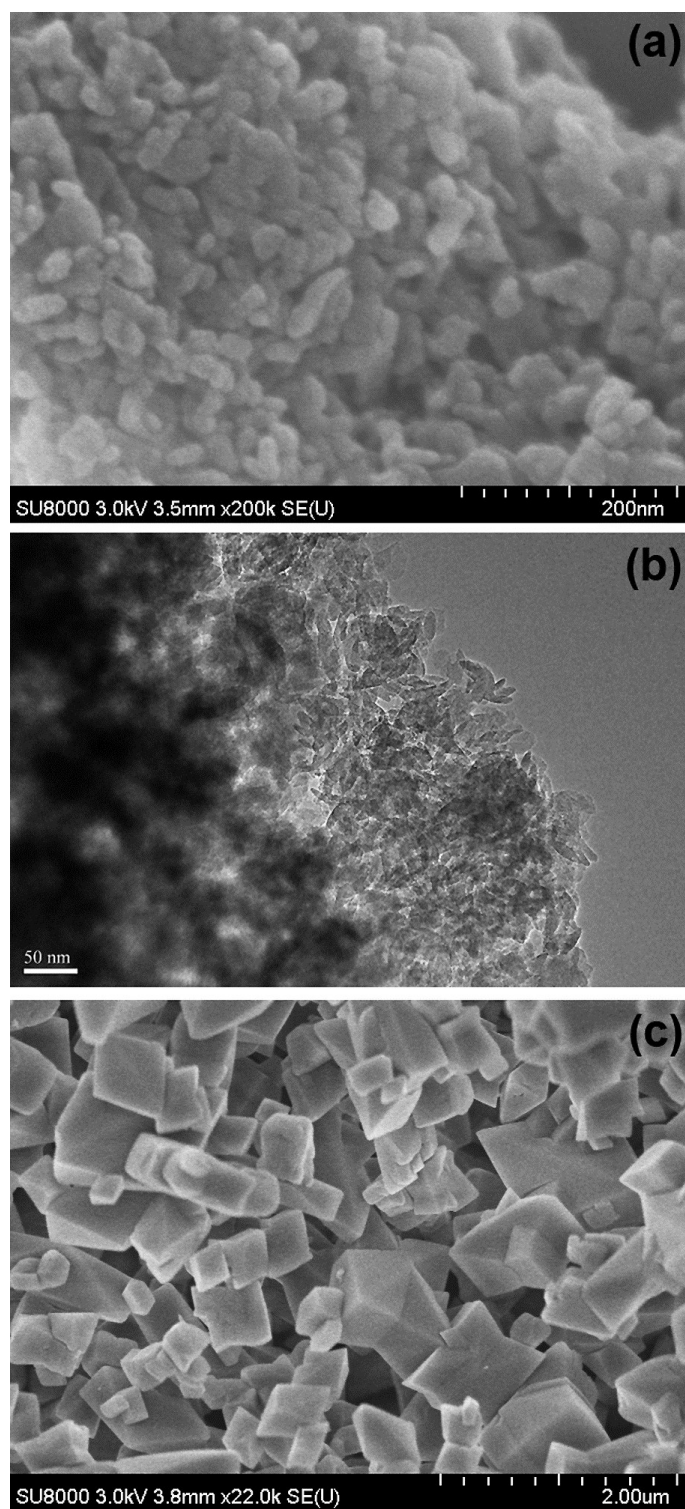

**Fig. S3** Representative SEM (a) and TEM (b) pictures of  $\text{NH}_2\text{-MIL-53(Al)}_{\text{it}}$ , and SEM picture (c) of  $\text{NH}_2\text{-MIL-53(Al)}_{\text{ref(as)}}$  samples.

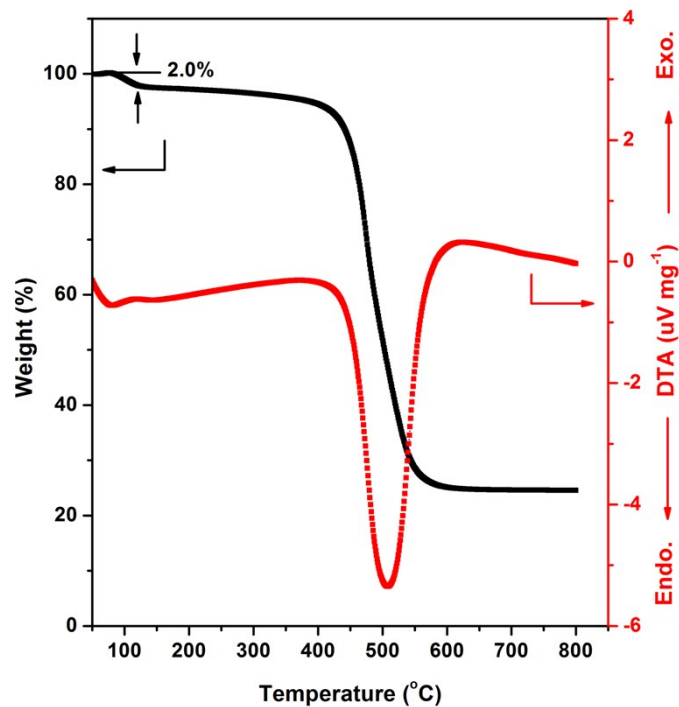

Fig. S4 TG-DTA curves of  $\text{NH}_2\text{-MIL-53(Al)}_{\text{ref}}$  reference sample.

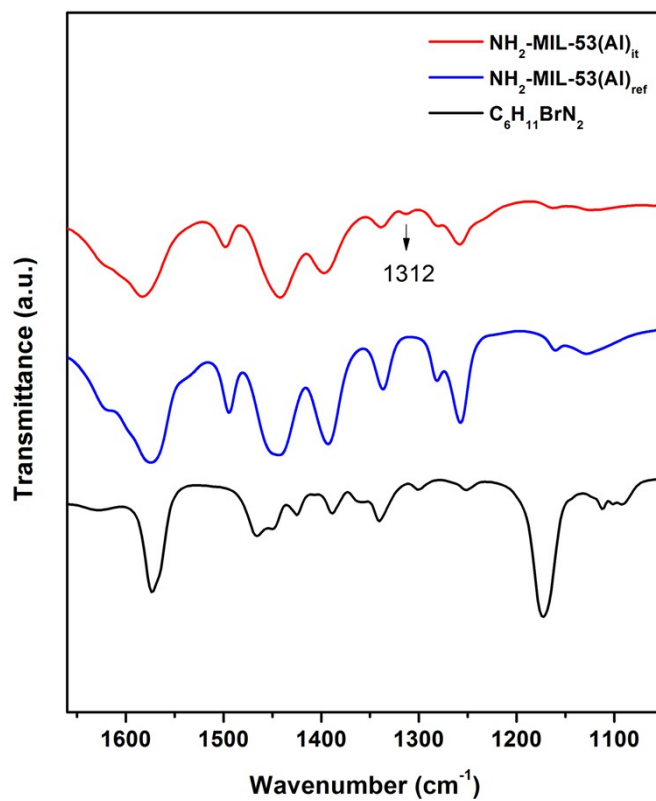

Fig. S5 IR spectra of  $\text{NH}_2\text{-MIL-53(Al)}_{\text{it}}$ ,  $\text{NH}_2\text{-MIL-53(Al)}_{\text{ref}}$  and 1-ethyl-3-methyl-

imidazolium bromide.

**Table S1** Elemental analyses of  $\text{NH}_2\text{-MIL-53(Al)}_{it}$  and  $\text{NH}_2\text{-MIL-53(Al)}_{ref}$  samples.

| Sample                                | N (wt.%) <sup>a</sup> | C (wt.%) <sup>a</sup> | H (wt.%) <sup>a</sup> | Al (wt.%) <sup>b</sup> | N/C   | Al/C  |
|---------------------------------------|-----------------------|-----------------------|-----------------------|------------------------|-------|-------|
| $\text{NH}_2\text{-MIL-53(Al)}_{it}$  | 6.74                  | 38.7                  | 2.90                  | 9.6                    | 0.174 | 0.248 |
| $\text{NH}_2\text{-MIL-53(Al)}_{ref}$ | 5.44                  | 38.3                  | 2.92                  | 11.8                   | 0.142 | 0.308 |

<sup>a</sup> measured on CHNS/O analyzer.

<sup>b</sup> measured on ICP spectrometer.

Elemental analysis cal. for  $\text{NH}_2\text{-MIL-53(Al)}$  ( $\text{Al(OH)[NH}_2\text{-BDC]}\cdot\text{H}_2\text{O}$ ): C, 39.83%; H, 3.32%; N, 5.81%; Al, 11.2%; N/C, 0.146; Al/C, 0.282. The similar values in N/C and Al/C ratios for  $\text{NH}_2\text{-MIL-53(Al)}_{ref}$  and  $\text{NH}_2\text{-MIL-53(Al)}$  suggest that  $\text{NH}_2\text{-MIL-53(Al)}_{ref}$  has the same structure of  $\text{Al(OH)[NH}_2\text{-BDC]}\cdot\text{H}_2\text{O}$ .

**Table S2** A summary of proton-conducting performances of different MOF materials tested under high temperatures and low humidity in recent reports.

| MOFs                                                          | Temperature (°C) | RH (%)    | Conductivity ( $\text{S cm}^{-1}$ ) | Ref.      |
|---------------------------------------------------------------|------------------|-----------|-------------------------------------|-----------|
| $\text{NH}_2\text{-MIL-53(Al)}$                               | 80               | 26        | $3.0\times 10^{-5}$                 | This work |
| MOF-74                                                        | 146              | anhydrous | $4.3\times 10^{-9}$                 | 15        |
| In-IA-2D                                                      | 90               | anhydrous | $1.18\times 10^{-5}$                | 7         |
| $\text{Zn(H}_2\text{PO}_4)_2(\text{TzH})_2$                   | 45-150           | anhydrous | $10^{-7}\sim 10^{-4}$               | S1        |
| $\text{Al(OH)(1, 4-ndc)}$                                     | 25-120           | anhydrous | $10^{-8}\sim 10^{-5}$               | 27        |
| $\text{Zn}_2(\text{ox})_3$                                    | 30-150           | anhydrous | $10^{-5}\sim 10^{-4}$               | S2        |
| UiO-67                                                        | 50-120           | anhydrous | $10^{-7}\sim 10^{-3}$               | S3        |
| ZIF-8                                                         | 80               | 20        | $10^{-8}$                           | S4        |
| $\text{La}_3\text{PP}_4(\text{H}_2\text{O})_6$                | 90-110           | 20        | $10^{-7}$                           | 8         |
| Mg, Sr, Ba-BPTC                                               | 23-100           | 43-98     | $10^{-8}\sim 10^{-4}$               | 12        |
| $\text{Eu}_2(\text{CO}_3)(\text{ox})_2(\text{H}_2\text{O})_2$ | 25-100           | 40-90     | $10^{-6}\sim 10^{-4}$               | S5        |

Supplementary references:

1. D. Umeyama, S. Horike, M. Inukai, T. Itakura and S. Kitagawa, *J. Am. Chem. Soc.*, 2012, **134**, 12780-12785.
2. S. S. Nagarkar, S. M. Unni, A. Sharma, S. Kurungot and S. K. Ghosh, *Angew. Chem. Int. Ed.*, 2014, **53**, 2638-2642.
3. S. C. Liu, Z. F. Yue and Y. Liu, *Dalton Trans.*, 2015, **44**, 12976-12980.
4. P. Barbosa, N. C. Rosero-Navarro, F. N. Shi and F. M. L. Figueiredo, *Electrochim. Acta*, 2015, **153**, 19-27.
5. Q. Tang, Y. W. Liu, S. X. Liu, D. F. He, J. Miao, X. Q. Wang, G. C. Yang, Z. Shi and Z. P. Zheng, *J. Am. Chem. Soc.*, 2014, **136**, 12444-12449.
